# Supplementary material for: Novel heterococcolithophores, holococcolithophores and life cycle combinations from the families Syracosphaeraceae and Papposphaeraceae and the genus &lt;i&gt;Florisphaera&lt;/i&gt;
Source: Copernicus journal article supplement (doi:10.5194/jm-40-75-2021), 2021-08-18
Supplement: Supplementary file 1 [file jm-40-75-2021-supplement.zip]

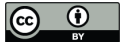

*Supplement of*

**Novel heterococcolithophores, holococcolithophores and life cycle combinations from the families Syracosphaeraceae and Papposphaeraceae and the genus *Florisphaera***

**Sabine Keuter et al.**

*Correspondence to:* Miguel J. Frada ([miguel.frada@mail.huji.ac.il](mailto:miguel.frada@mail.huji.ac.il)) and Jeremy R. Young ([jeremy.young@ucl.ac.uk](mailto:jeremy.young@ucl.ac.uk))

- [jm-40-75-2021-supplement-title-page.pdf](#)
- [SupplementaryTables](#)
  - [Suppl\\_Table S1\\_SamplesCellcountsData.xlsx](#)
  - [Suppl\\_TableS2\\_MeasurementsOphiaster.xlsx](#)

The copyright of individual parts of the supplement might differ from the article licence.
