# Supplementary material for: Novel heterococcolithophores, holococcolithophores and life cycle combinations from the families Syracosphaeraceae and Papposphaeraceae and the genus &lt;i&gt;Florisphaera&lt;/i&gt;
Source: Copernicus journal article supplement (doi:10.5194/jm-40-75-2021), 2021-08-18
Supplement: Supplementary file 1 [file Suppl_Table S1_SamplesCellcountsData.xlsx]

## Sheet: Suppl Table S1
Table S1: details of samples used in the study, n/a = not available, coccolithophore densities of species in the GoA (Fig. 6 and 11) in cells L^-1
Figure in the manuscript	Negative number	stub	Ocean region	Cruise	Latitude	Longitude	Station	Date	Bottom depth [m]	Sample depth [m]	Temperature [øC]	Salinity
15a-f			Gulf of Naples	1203	40.816	14.25	MC	2016-05-31	70	1	21.11	37.23
			Gulf of Naples	1205	40.816	14.25	MC	2016-06-14	70	1	23.7	37.35
			Gulf of Naples	1205	40.816	14.25	MC	2016-06-14	70	10	22.35	37.5
			Gulf of Naples	1205	40.816	14.25	MC	2016-06-14	70	60	15	38.07
			Gulf of Naples	1208	40.816	14.25	MC	2016-07-05	70	1	25.83	37.78
8a			Gulf of Naples	1208	40.816	14.25	MC	2016-07-05	70	60	15.3	38.03
			Gulf of Naples	1214	40.816	14.25	MC	2016-08-25	70	1	24.3	38.03
			Gulf of Naples	1218	40.816	14.25	MC	2016-09-20	70	1	24	37.45
16			Gulf of Naples	1228	40.816	14.25	MC	2016-11-30	70	10	18.34	38.07
8b			Gulf of Naples	1241	40.816	14.25	MC	2017-03-09	70	1	14.63	38.04
8c			Gulf of Naples	1244	40.816	14.25	MC	2017-03-28	70	20	15.31	37.97
			Gulf of Naples	1254	40.816	14.25	MC	2017-06-06	70	1	22.83	37.78
1d	Tsagaraki1		NE Atlantic		34	11				50	n/a	n/a
1e	200-02	470/2	Alboran Sea	Mater II	37.43	-0.42	Mater II Stn 69/11	Oct. 1999		50	n/a	n/a
2b	317-015	459/2	Alboran Sea	Mater II	37.43	-0.42	Mater II Stn 69/11	Oct. 1999		42.5	n/a	n/a
2c	289-60	704/2	S. Atlantic	AMT18	-32.18	-29.83	AMT18 CTD089	2008-11-02		72	16.41	35.61
2d	225-03	539/1	Atlantic	AMT14	11.75	-25	AMT14 CTD26	2004-05-08		120	20.17	36.25
3	203-02	471/2	Caribbean	ODP	16.55	-79.87	ODP 1000A-16H-1 55cm	2003
5c	280-21C	703/0	S. Atlantic	AMT18	-32.18	-29.83	AMT18 CTD089	2008-11-02		0	17.33	35.58
5d	193-24	256/2	N. Atlantic	Meteor 38	21.28	-20.7	M38/1 Stn13	1997-01-29		5	21.3	n/a
5e	217-54	533/0	N. Pacific	HOTS 169	21.34	-158.27	HOTS169 Stn2 CTD13	June 2004		80	23.77	35.07
5f	179-27	302/1	Alboran Sea	Mater II	37.43	-0.42	MATER II stn69/12	Oct. 1999		35	n/a	n/a
														Cells per Liter
														S. pulchra HET	S. pulchra HOL galea	S. mediterranea HET	S. mediterranea HOL marisrubri	S. mediterranea HOL gracillima	S. mediterranea HOL hellenica	C. leptoporus subsp. quadriperforatus HOL	O. formosus	O. macrospinus	P. vexillata
			Gulf of Aqaba		29.467	34.9297	A	2017-03-27	700	2	21.11	40.63		0	0	0	0	0	0	0	451.662	0	0
			Gulf of Aqaba		29.467	34.9297	A	2017-03-27	700	20	21.12	40.63		0	0	0	0	0	0	0	951.683	0	0
			Gulf of Aqaba		29.467	34.9297	A	2017-03-27	700	60	21.14	40.64		0	0	0	0	0	0	0	327.031	0	0
			Gulf of Aqaba		29.467	34.9297	A	2017-03-27	700	100	21.14	40.64		0	0	0	0	0	0	0	584.438	0	0
			Gulf of Aqaba		29.467	34.9297	A	2017-03-27	700	140	21.16	40.64		0	0	0	0	0	0	0	110.086	0	0
			Gulf of Aqaba		29.467	34.9297	A	2017-04-18	700	2	21.94	40.55		0	0	0	0	0	0	0	802.821	0	0
			Gulf of Aqaba		29.467	34.9297	A	2017-04-18	700	20	21.89	40.54		0	0	0	0	0	0	0	1110.08	0	0
			Gulf of Aqaba		29.467	34.9297	A	2017-04-18	700	40	21.68	40.56		0	206.384	0	103.192	0	0	0	619.152	0	0
			Gulf of Aqaba		29.467	34.9297	A	2017-04-18	700	60	21.58	40.59		0	0	0	0	0	0	0	238.75	0	0
			Gulf of Aqaba		29.467	34.9297	A	2017-04-18	700	80	21.37	40.58		0	0	0	0	0	0	0	1071.03	0	0
			Gulf of Aqaba		29.467	34.9297	A	2017-04-18	700	100	21.28	40.6		0	0	0	0	0	0	0	0	0	0
14a			Gulf of Aqaba		29.467	34.9297	A	2017-04-18	700	120	21.22	40.61		0	0	0	0	0	0	0	255.793	0	85.2642
14b,c			Gulf of Aqaba		29.467	34.9297	A	2017-04-18	700	140	21.2	40.62		0	0	0	0	0	0	0	186.592	0	0
			Gulf of Aqaba		29.467	34.9297	A	2017-04-26	700	2	21.78	40.54		0	0	0	0	0	0	0	156.629	0	0
			Gulf of Aqaba		29.467	34.9297	A	2017-04-26	700	10	21.77	40.59		0	0	0	97.4854	0	0	0	584.913	0	0
			Gulf of Aqaba		29.467	34.9297	A	2017-04-26	700	20	21.76	40.59		0	0	0	83.3906	0	0	0	83.3906	0	0
			Gulf of Aqaba		29.467	34.9297	A	2017-04-26	700	30	21.77	40.59		0	0	0	0	0	0	0	0	0	0
			Gulf of Aqaba		29.467	34.9297	A	2017-04-26	700	40	21.76	40.59		0	0	0	0	0	0	0	153.253	0	0
13b			Gulf of Aqaba		29.467	34.9297	A	2017-04-26	700	60	21.4	40.57		0	0	0	0	0	0	0	207	0	69
			Gulf of Aqaba		29.467	34.9297	A	2017-04-26	700	80	21.3	40.6		0	0	0	0	0	0	0	65.9018	0	0
			Gulf of Aqaba		29.467	34.9297	A	2017-04-26	700	100	21.24	40.61		0	0	0	0	0	0	0	0	0	0
			Gulf of Aqaba		29.467	34.9297	A	2017-04-26	700	120	21.19	40.62		0	0	0	0	0	0	0	0	0	0
13a			Gulf of Aqaba		29.467	34.9297	A	2017-04-26	700	140	21.18	40.63		0	0	0	0	0	0	0	314.469	0	104.823
			Gulf of Aqaba		29.467	34.9297	A	2017-05-15	700	2	23.56	40.57		0	0	171.791	0	0	0	0	0	0	0
			Gulf of Aqaba		29.467	34.9297	A	2017-05-15	700	20	23.09	40.58		78.7374	157.475	236.212	0	0	0	0	0	0	0
			Gulf of Aqaba		29.467	34.9297	A	2017-05-15	700	30	23.07	40.58		157.475	78.7374	78.7374	0	0	0	0	157.475	0	0
			Gulf of Aqaba		29.467	34.9297	A	2017-05-15	700	40	22.52	40.53		139.86	0	0	0	0	0	0	0	0	0
			Gulf of Aqaba		29.467	34.9297	A	2017-05-15	700	60	22.19	40.56		83.0637	0	0	83.0637	0	0	0	1329.02	0	0
			Gulf of Aqaba		29.467	34.9297	A	2017-05-15	700	80	21.98	40.58		0	0	0	77.8254	0	0	0	1556.51	0	0
			Gulf of Aqaba		29.467	34.9297	A	2017-05-15	700	100	21.76	40.59		0	0	0	0	0	0	0	727.157	0	0
			Gulf of Aqaba		29.467	34.9297	A	2017-05-15	700	120	21.63	40.59		0	0	0	64.4673	0	0	0	128.935	0	0
			Gulf of Aqaba		29.467	34.9297	A	2017-05-15	700	140	21.54	40.59		0	0	0	0	0	0	0	41.8332	0	0
			Gulf of Aqaba		29.467	34.9297	A	2017-05-28	700	2	23.87	40.61		0	89.9856	89.9856	0	0	0	0	89.9856	0	0
			Gulf of Aqaba		29.467	34.9297	A	2017-05-28	700	10	23.66	40.59		393.749	1328.9	246.093	0	0	0	0	0	0	0
4d			Gulf of Aqaba		29.467	34.9297	A	2017-05-28	700	20	23.56	40.58		447.972	1320.34	306.507	0	23.5775	0	0	23.5775	0	0
			Gulf of Aqaba		29.467	34.9297	A	2017-05-28	700	30	23.5	40.59		545.445	709.078	272.722	0	0	0	0	0	0	0
			Gulf of Aqaba		29.467	34.9297	A	2017-05-28	700	40	23.48	40.6		83.2925	999.51	166.585	0	83.2925	0	0	0	0	0
			Gulf of Aqaba		29.467	34.9297	A	2017-05-28	700	60	23.31	40.56		301.653	301.653	50.2755	0	0	0	50.2755	0	0	0
			Gulf of Aqaba		29.467	34.9297	A	2017-05-28	700	80	22.91	40.54		181.539	0	0	0	0	0	0	90.7696	0	0
			Gulf of Aqaba		29.467	34.9297	A	2017-05-28	700	100	22.79	40.55		68.0972	0	0	0	0	0	0	408.583	0	0
			Gulf of Aqaba		29.467	34.9297	A	2017-05-28	700	120	22.51	40.55		0	0	0	0	0	0	0	561.729	0	0
			Gulf of Aqaba		29.467	34.9297	A	2017-05-28	700	140	22.13	40.56		0	0	0	0	0	0	0	66.9331	0	0
			Gulf of Aqaba		29.467	34.9297	A	2017-06-18	700	2	24.16	40.61		193.815	339.177	0	0	0	0	0	0	0	0
			Gulf of Aqaba		29.467	34.9297	A	2017-06-18	700	10	24.1	40.61		83.9866	125.98	41.9933	0	0	0	0	0	0	0
			Gulf of Aqaba		29.467	34.9297	A	2017-06-18	700	20	24.02	40.61		49.0198	343.139	49.0198	0	0	0	0	0	0	0
			Gulf of Aqaba		29.467	34.9297	A	2017-06-18	700	30	23.61	40.53		167.973	419.933	41.9933	0	83.9866	0	41.9933	0	0	0
			Gulf of Aqaba		29.467	34.9297	A	2017-06-18	700	40	23.21	40.45		192.217	432.489	0	0	96.1086	0	0	144.163	0	0
			Gulf of Aqaba		29.467	34.9297	A	2017-06-18	700	60	23.03	40.5		0	0	0	0	0	0	95.9847	335.946	0	0
			Gulf of Aqaba		29.467	34.9297	A	2017-06-18	700	80	22.81	40.5		0	0	0	0	0	0	0	3998.85	0	0
			Gulf of Aqaba		29.467	34.9297	A	2017-06-18	700	100	22.5	40.5		0	0	0	0	0	0	0	1700.01	0	0
9b			Gulf of Aqaba		29.467	34.9297	A	2017-06-18	700	120	22.27	40.54		39.9421	0	0	0	39.9421	0	0	679.015	0	0
			Gulf of Aqaba		29.467	34.9297	A	2017-06-18	700	140	21.88	40.58		43.3853	0	0	0	0	0	0	86.7707	0	0
			Gulf of Aqaba		29.467	34.9297	A	2017-07-11	700	2	25.22	40.66		49.6059	694.483	49.6059	0	248.03	0	148.818	0	0	0
			Gulf of Aqaba		29.467	34.9297	A	2017-07-11	700	10	25.19	40.66		171.395	914.106	228.527	0	57.1316	0	228.527	228.527	0	0
			Gulf of Aqaba		29.467	34.9297	A	2017-07-11	700	20	25.08	40.62		64.7722	842.039	64.7722	0	64.7722	0	129.544	194.317	0	0
			Gulf of Aqaba		29.467	34.9297	A	2017-07-11	700	30	24.83	40.59		166.047	913.258	0	0	41.5117	0	249.07	124.535	0	0
4a			Gulf of Aqaba		29.467	34.9297	A	2017-07-11	700	40	24.49	40.53		233.577	1214.6	0	0	233.577	0	93.431	0	0	0
			Gulf of Aqaba		29.467	34.9297	A	2017-07-11	700	60	24.09	40.49		126.946	677.043	0	0	338.521	0	253.891	126.946	0	0
			Gulf of Aqaba		29.467	34.9297	A	2017-07-11	700	80	23.78	40.53		46.849	140.547	0	0	93.6979	0	0	515.338	0	0
			Gulf of Aqaba		29.467	34.9297	A	2017-07-11	700	100	23.35	40.5		0	0	0	0	0	0	0	1336.06	0	0
			Gulf of Aqaba		29.467	34.9297	A	2017-07-11	700	120	22.93	40.48		0	37.3369	0	0	0	0	0	224.022	0	37.3369
			Gulf of Aqaba		29.467	34.9297	A	2017-07-11	700	140	22.12	40.56		0	0	0	0	0	0	0	0	0	0
			Gulf of Aqaba		29.467	34.9297	A	2017-07-20	700	30	25.66	40.62		297.613	694.431	595.226	0	0	0	0	595.226	0	0
			Gulf of Aqaba		29.467	34.9297	A	2017-07-20	700	100	24.09	40.55		0	0	0	0	80.9832	0	80.9832	3401.29	0	0
			Gulf of Aqaba		29.467	34.9297	A	2017-08-17	700	2	26.61	40.72		272.026	680.065	90.6754	0	45.3377	0	453.377	136.013	0	0
			Gulf of Aqaba		29.467	34.9297	A	2017-08-17	700	10	26.3	40.65		899.198	687.622	52.894	0	0	0	211.576	0	0	0
			Gulf of Aqaba		29.467	34.9297	A	2017-08-17	700	20	25.79	40.59		690.406	641.091	98.6294	0	197.259	0	789.035	0	0	0
			Gulf of Aqaba		29.467	34.9297	A	2017-08-17	700	30	25.57	40.65		450.608	50.0676	0	0	150.203	0	150.203	550.743	0	0
7 g,h, 5a			Gulf of Aqaba		29.467	34.9297	A	2017-08-17	700	40	25.51	40.58		713.715	1207.82	0	0	54.9011	0	1372.53	0	0	0
			Gulf of Aqaba		29.467	34.9297	A	2017-08-17	700	60	24.96	40.58		0	786.077	0	0	120.935	0	423.272	302.337	0	0
1c			Gulf of Aqaba		29.467	34.9297	A	2017-08-17	700	80	24.53	40.56		289.361	651.063	0	0	0	0	0	2097.87	0	0
			Gulf of Aqaba		29.467	34.9297	A	2017-08-17	700	100	23.78	40.54		0	0	0	0	0	0	0	1527.18	723.403	0
12e			Gulf of Aqaba		29.467	34.9297	A	2017-08-17	700	120	23.04	40.53		0	0	0	0	0	0	0	852.651	0	0
			Gulf of Aqaba		29.467	34.9297	A	2017-08-17	700	140	22.6	40.54		0	0	0	0	0	0	0	0	190.369	0
			Gulf of Aqaba		29.467	34.9297	A	2017-09-11	700	2	25.33	40.69		86.131	689.048	0	0	172.262	0	602.917	0	0	0
			Gulf of Aqaba		29.467	34.9297	A	2017-09-11	700	10	25.32	40.68		290.005	483.341	0	0	0	0	96.6683	0	0	0
			Gulf of Aqaba		29.467	34.9297	A	2017-09-11	700	20	25.17	40.64		295.306	147.653	73.8265	0	0	0	221.48	0	0	0
			Gulf of Aqaba		29.467	34.9297	A	2017-09-11	700	40	24.48	40.57		82.3029	164.606	0	0	0	0	329.212	0	0	0
			Gulf of Aqaba		29.467	34.9297	A	2017-09-11	700	60	24.1	40.52		0	141.902	0	0	0	0	141.902	1419.02	0	0
			Gulf of Aqaba		29.467	34.9297	A	2017-09-11	700	80	23.63	40.55		0	0	0	0	0	0	0	295.306	0	0
			Gulf of Aqaba		29.467	34.9297	A	2017-09-11	700	100	23.05	40.54		0	0	0	0	0	0	0	216.871	43.3741	0
9a,c,d,e, 12b,c,d,f 13c,d			Gulf of Aqaba		29.467	34.9297	A	2017-09-11	700	120	22.56	40.55		0	0	0	0	0	0	0	437.257	0	43.7257
			Gulf of Aqaba		29.467	34.9297	A	2017-09-11	700	140	22.27	40.56		0	0	0	0	0	0	0	0	43.4361	0
			Gulf of Aqaba		29.467	34.9297	A	2017-09-13	700	40	24.65	40.48		229.956	306.608	0	0	0	0	306.608	76.652	0	0
1a			Gulf of Aqaba		29.467	34.9297	A	2017-09-13	700	80	23.97	40.49		0	0	0	0	0	0	0	822.388	0	0
			Gulf of Aqaba		29.467	34.9297	A	2017-10-18	700	2	24.76	40.67		294.3	392.399	0	0	49.0499	0	49.0499	441.449	0	0
4c			Gulf of Aqaba		29.467	34.9297	A	2017-10-18	700	10	24.76	40.66		396.641	347.06	49.5801	0	198.32	0	148.74	396.641	0	0
			Gulf of Aqaba		29.467	34.9297	A	2017-10-18	700	20	24.77	40.66		347.06	148.74	0	0	247.9	0	198.32	297.48	0	0
			Gulf of Aqaba		29.467	34.9297	A	2017-10-18	700	30	24.77	40.66		387.589	43.0655	0	0	129.196	0	129.196	473.72	0	0
			Gulf of Aqaba		29.467	34.9297	A	2017-10-18	700	40	24.77	40.66		117.94	235.881	0	0	0	0	0	707.642	0	0
			Gulf of Aqaba		29.467	34.9297	A	2017-10-18	700	60	24.55	40.65		636.93	283.08	0	0	70.77	0	70.77	849.24	70.77	0
9f			Gulf of Aqaba		29.467	34.9297	A	2017-10-18	700	80	23.93	40.53		0	0	0	0	0	0	0	7606.62	0	0
			Gulf of Aqaba		29.467	34.9297	A	2017-10-18	700	100	23.44	40.51		0	0	0	0	0	0	0	194.928	0	48.732
			Gulf of Aqaba		29.467	34.9297	A	2017-10-18	700	120	23.08	40.49		0	0	0	0	0	0	0	152.809	152.809	0
			Gulf of Aqaba		29.467	34.9297	A	2017-10-18	700	140	22.75	40.49		0	0	0	0	0	0	0	0	45.2916	0
			Gulf of Aqaba		29.467	34.9297	A	2017-10-29	700	2	24.6	40.68		47.7733	0	0	0	0	0	0	573.279	0	0
			Gulf of Aqaba		29.467	34.9297	A	2017-10-29	700	20	24.6	40.68		242.067	48.4135	0	48.4135	48.4135	0	0	435.721	0	0
7 b,c			Gulf of Aqaba		29.467	34.9297	A	2017-10-29	700	40	24.6	40.68		181.166	0	0	90.5831	45.2916	0	0	317.041	271.749	0
7a			Gulf of Aqaba		29.467	34.9297	A	2017-10-29	700	60	24.59	40.68		222.074	88.8296	0	0	44.4148	0	0	177.659	0	0
			Gulf of Aqaba		29.467	34.9297	A	2017-10-29	700	80	24.49	40.67		155.454	116.59	0	0	0	0	0	194.317	77.7269	0
			Gulf of Aqaba		29.467	34.9297	A	2017-10-29	700	100	24.31	40.61		42.0175	0	0	0	0	0	0	1008.42	210.087	42.0175
			Gulf of Aqaba		29.467	34.9297	A	2017-10-29	700	120	23.53	40.5		0	0	0	0	0	0	0	174.373	0	43.5931
			Gulf of Aqaba		29.467	34.9297	A	2017-10-29	700	140	22.67	40.5		0	0	0	0	0	0	0	0	90.5831	45.2916
			Gulf of Aqaba		29.467	34.9297	A	2017-11-13	700	2	23.89	40.69		286.64	57.3279	0	0	57.3279	0	0	229.312	0	0
			Gulf of Aqaba		29.467	34.9297	A	2017-11-13	700	20	23.86	40.69		116.192	58.0962	0	0	174.289	0	0	813.346	0	0
			Gulf of Aqaba		29.467	34.9297	A	2017-11-13	700	40	23.86	40.69		56.6144	56.6144	0	56.6144	56.6144	0	0	566.144	0	0
			Gulf of Aqaba		29.467	34.9297	A	2017-11-13	700	80	23.87	40.69		169.334	112.889	0	112.889	0	0	0	790.223	0	0
			Gulf of Aqaba		29.467	34.9297	A	2017-11-13	700	100	23.87	40.69		64.1567	0	0	0	0	0	0	641.567	0	0
			Gulf of Aqaba		29.467	34.9297	A	2017-11-13	700	120	23.87	40.68		0	0	0	0	108.983	0	0	817.371	54.4914	0
			Gulf of Aqaba		29.467	34.9297	A	2017-11-13	700	140	23.86	40.68		116.329	0	0	116.329	58.1643	0	0	290.821	0	0
			Gulf of Aqaba		29.467	34.9297	A	2017-12-11	700	2	22.9	40.73		0	0	0	208.655	0	0	0	3129.83	0	0
			Gulf of Aqaba		29.467	34.9297	A	2017-12-11	700	20	22.9	40.73		0	0	0	62.5966	0	0	0	3192.43	0	0
			Gulf of Aqaba		29.467	34.9297	A	2017-12-11	700	40	22.92	40.73		0	0	0	218.277	0	0	0	1673.46	0	0
			Gulf of Aqaba		29.467	34.9297	A	2017-12-11	700	60	22.92	40.73		0	0	0	60.0589	0	0	0	3423.36	0	0
			Gulf of Aqaba		29.467	34.9297	A	2017-12-11	700	100	22.93	40.73		0	0	0	107.352	0	0	0	1878.65	0	0
			Gulf of Aqaba		29.467	34.9297	A	2017-12-11	700	120	22.94	40.73		0	0	0	100.098	0	0	0	3103.04	0	0
			Gulf of Aqaba		29.467	34.9297	A	2017-12-11	700	140	22.94	40.73		0	0	0	70.5454	70.5454	0	0	2751.27	0	0
			Gulf of Aqaba		29.467	34.9297	A	2018-01-15	700	2	22.3	40.67		0	0	0	45.8875	0	0	0	1101.3	0	0
			Gulf of Aqaba		29.467	34.9297	A	2018-01-15	700	20	22.31	40.67		0	42.1869	0	0	0	0	0	632.803	0	0
			Gulf of Aqaba		29.467	34.9297	A	2018-01-15	700	60	22.32	40.67		0	0	0	0	48.732	0	0	1998.01	0	0
			Gulf of Aqaba		29.467	34.9297	A	2018-01-15	700	100	22.33	40.67		0	0	0	96.1982	0	0	0	2020.16	0	0
			Gulf of Aqaba		29.467	34.9297	A	2018-02-15	700	2	21.79	40.58		0	0	0	57.7489	0	0	0	1847.97	0	0
			Gulf of Aqaba		29.467	34.9297	A	2018-02-15	700	20	21.84	40.64		52.1978	0	0	52.1978	0	0	0	469.78	0	0
			Gulf of Aqaba		29.467	34.9297	A	2018-02-15	700	60	21.85	40.65		0	0	0	85.2582	0	0	0	0	0	0
			Gulf of Aqaba		29.467	34.9297	A	2018-02-15	700	100	21.86	40.65		0	0	0	0	0	0	0	270.282	0	0
			Gulf of Aqaba		29.467	34.9297	A	2018-02-15	700	140	21.87	40.65		0	0	0	116.873	0	0	0	701.235	0	0
			Gulf of Aqaba		29.467	34.9297	A	2018-02-26	700	2	21.79	40.63		0	0	0	70.9993	0	0	0	283.997	0	0
			Gulf of Aqaba		29.467	34.9297	A	2018-02-26	700	20	21.78	40.63		0	0	0	74.0726	0	0	0	962.944	0	0
			Gulf of Aqaba		29.467	34.9297	A	2018-02-26	700	60	21.78	40.62		0	0	0	131.916	0	0	0	593.621	0	0
			Gulf of Aqaba		29.467	34.9297	A	2018-02-26	700	100	21.79	40.64		0	0	0	0	0	0	0	766.257	0	0
			Gulf of Aqaba		29.467	34.9297	A	2018-02-26	700	140	21.79	40.65		0	0	0	0	0	0	0	716.599	0	0
			Gulf of Aqaba		29.467	34.9297	A	2018-03-18	700	2	21.91	40.59		0	0	0	0	0	0	0	0	0	0
7 f			Gulf of Aqaba		29.467	34.9297	A	2018-03-18	700	20	21.9	40.59		0	0	0	82.3029	0	0	0	246.909	0	0
			Gulf of Aqaba		29.467	34.9297	A	2018-03-18	700	40	21.9	40.59		0	0	0	0	0	0	0	710.406	0	0
			Gulf of Aqaba		29.467	34.9297	A	2018-03-18	700	60	21.89	40.59		0	0	0	69.749	0	0	0	209.247	0	0
			Gulf of Aqaba		29.467	34.9297	A	2018-03-18	700	80	21.82	40.62		0	0	0	0	0	0	0	0	0	0
			Gulf of Aqaba		29.467	34.9297	A	2018-03-18	700	100	21.76	40.63		0	0	0	0	0	0	0	125.863	0	41.9543
			Gulf of Aqaba		29.467	34.9297	A	2018-03-18	700	120	21.75	40.64		0	0	0	0	0	0	0	282.015	0	201.439
			Gulf of Aqaba		29.467	34.9297	A	2018-03-18	700	140	21.75	40.65		0	0	0	0	0	0	0	78.37	0	156.74
			Gulf of Aqaba		29.467	34.9297	A	2018-03-29	700	2	22.07	40.63		108.756	0	0	217.512	0	0	0	652.537	0	0
			Gulf of Aqaba		29.467	34.9297	A	2018-03-29	700	20	22.08	40.62		561.394	51.0359	0	51.0359	51.0359	0	0	306.215	0	0
			Gulf of Aqaba		29.467	34.9297	A	2018-03-29	700	40	22.07	40.62		50.9365	0	0	458.428	0	0	0	2495.89	0	0
			Gulf of Aqaba		29.467	34.9297	A	2018-03-29	700	60	21.98	40.6		0	0	0	192.411	0	0	0	1876.01	0	0
			Gulf of Aqaba		29.467	34.9297	A	2018-03-29	700	80	21.93	40.61		0	0	0	0	0	0	0	218.854	0	0
			Gulf of Aqaba		29.467	34.9297	A	2018-03-29	700	100	21.9	40.61		0	0	0	0	0	0	0	399.281	0	39.9281
			Gulf of Aqaba		29.467	34.9297	A	2018-03-29	700	120	21.88	40.61		48.1617	0	0	0	0	0	0	433.455	0	48.1617
			Gulf of Aqaba		29.467	34.9297	A	2018-03-29	700	140	21.87	40.61		0	0	0	0	0	0	0	249.07	0	0
			Gulf of Aqaba		29.467	34.9297	A	2018-04-16	700	2	22.29	40.63		382.998	63.8329	0	0	0	0	0	127.666	0	0
			Gulf of Aqaba		29.467	34.9297	A	2018-04-16	700	20	22.27	40.63		113.161	0	0	0	0	0	0	0	0	0
			Gulf of Aqaba		29.467	34.9297	A	2018-04-16	700	40	22.27	40.63		172.668	57.556	0	0	0	0	57.556	0	0	0
			Gulf of Aqaba		29.467	34.9297	A	2018-04-16	700	60	22.16	40.62		68.1275	0	0	0	0	0	204.383	408.765	0	0
			Gulf of Aqaba		29.467	34.9297	A	2018-04-16	700	80	22.13	40.62		120.839	0	0	0	0	0	0	2175.1	0	0
			Gulf of Aqaba		29.467	34.9297	A	2018-04-16	700	100	22.12	40.63		68.9472	0	0	0	0	0	0	1103.16	0	0
			Gulf of Aqaba		29.467	34.9297	A	2018-04-16	700	120	22.1	40.64		58.8411	0	0	0	0	0	58.8411	294.205	0	0
			Gulf of Aqaba		29.467	34.9297	A	2018-04-16	700	140	22.03	40.63		0	0	0	0	0	0	0	740.952	0	0
			Gulf of Aqaba		29.467	34.9297	A	2018-05-16	700	2	24.35	40.56		1346.48	641.181	577.063	0	0	0	0	0	0	0
			Gulf of Aqaba		29.467	34.9297	A	2018-05-16	700	20	24.32	40.48		533.034	592.26	59.226	0	0	0	0	0	0	0
			Gulf of Aqaba		29.467	34.9297	A	2018-05-16	700	40	23.66	40.45		264.94	317.929	52.9881	0	52.9881	0	0	0	0	0
			Gulf of Aqaba		29.467	34.9297	A	2018-05-16	700	60	23.15	40.53		318.59	318.59	0	0	0	0	0	0	0	0
			Gulf of Aqaba		29.467	34.9297	A	2018-05-16	700	80	22.9	40.53		0	0	0	0	0	0	0	2837.53	0	0
			Gulf of Aqaba		29.467	34.9297	A	2018-05-16	700	100	22.66	40.56		58.6344	0	0	0	0	0	0	1231.32	0	0
			Gulf of Aqaba		29.467	34.9297	A	2018-05-16	700	120	22.49	40.57		0	0	0	0	0	0	0	0	0	0
			Gulf of Aqaba		29.467	34.9297	A	2018-05-16	700	140	22.29	40.6		0	0	0	0	0	0	0	0	0	0
4b			Gulf of Aqaba		29.467	34.9297	A	2018-06-18	700	20	26.2	40.58		476.893	357.67	238.446	0	0	0	59.6116	0	0	0
			Gulf of Aqaba		29.467	34.9297	A	2018-06-18	700	90	23.32	40.51		0	0	57.1659	0	0	0	0	4687.61	0	0
			Gulf of Aqaba		29.467	34.9297	A	2018-08-15	700	2	28.16	40.89		499.395	0	0	0	0	0	0	0	0	0
			Gulf of Aqaba		29.467	34.9297	A	2018-08-15	700	10	28.02	40.8		519.513	103.903	311.708	0	0	0	0	103.903	0	0
			Gulf of Aqaba		29.467	34.9297	A	2018-08-15	700	20	27.66	40.66		628.344	0	269.29	0	89.7634	0	0	0	0	0
			Gulf of Aqaba		29.467	34.9297	A	2018-08-15	700	30	27.04	40.53		507.143	63.3929	507.143	0	0	0	63.3929	63.3929	0	0
			Gulf of Aqaba		29.467	34.9297	A	2018-08-15	700	40	26.8	40.52		116.394	290.984	116.394	0	116.394	58.1968	232.787	0	0	0
			Gulf of Aqaba		29.467	34.9297	A	2018-08-15	700	60	26.26	40.5		56.3493	845.239	56.3493	0	112.699	0	394.445	0	0	0
			Gulf of Aqaba		29.467	34.9297	A	2018-08-15	700	80	25.73	40.47		272.272	707.908	0	0	54.4544	108.909	490.09	0	0	0
			Gulf of Aqaba		29.467	34.9297	A	2018-08-15	700	100	24.78	40.41		90.223	45.1115	0	0	0	0	90.223	631.561	0	0
			Gulf of Aqaba		29.467	34.9297	A	2018-08-15	700	120	23.4	40.48		0	0	0	0	0	0	0	0	436.816	0
			Gulf of Aqaba		29.467	34.9297	A	2018-08-15	700	140	22.83	40.55		0	0	0	0	0	0	0	34.5578	0	0
			Gulf of Aqaba		29.467	34.9297	A	2018-10-17	700	2	25.67	40.62		0	64.9925	0	0	0	0	64.9925	129.985	0	0
			Gulf of Aqaba		29.467	34.9297	A	2018-10-17	700	20	25.66	40.64		0	67.9291	0	0	0	0	0	0	0	0
			Gulf of Aqaba		29.467	34.9297	A	2018-10-17	700	40	25.67	40.64		108.907	54.4534	0	0	0	0	0	163.36	0	0
			Gulf of Aqaba		29.467	34.9297	A	2018-10-17	700	60	25.67	40.64		52.2059	104.412	52.2059	0	0	0	0	104.412	0	0
			Gulf of Aqaba		29.467	34.9297	A	2018-10-17	700	80	25.68	40.64		168.809	0	0	0	0	0	56.2696	56.2696	0	0
			Gulf of Aqaba		29.467	34.9297	A	2018-10-17	700	100	24.9	40.47		0	0	0	0	0	0	0	118.045	0	0
			Gulf of Aqaba		29.467	34.9297	A	2018-10-17	700	120	23.74	40.46		0	0	0	0	0	0	0	53.4755	213.902	0
			Gulf of Aqaba		29.467	34.9297	A	2018-10-17	700	140	23.13	40.5		0	0	0	0	0	0	0	0	138.821	0
			Gulf of Aqaba		29.467	34.9297	A	2018-11-14	700	20	25.06	40.71		436.858	0	0	174.743	87.3716	0	0	0	0	0
			Gulf of Aqaba		29.467	34.9297	A	2018-11-14	700	60	25.01	40.72		199.027	0	0	132.685	66.3424	0	0	66.3424	0	0
			Gulf of Aqaba		29.467	34.9297	A	2018-11-14	700	100	25.02	40.72		238.109	0	0	79.3697	0	79.3697	0	79.3697	0	0
			Gulf of Aqaba		29.467	34.9297	A	2018-12-13	700	2	24.21	40.73		0	0	0	276.593	0	0	0	0	0	0
			Gulf of Aqaba		29.467	34.9297	A	2018-12-13	700	20	24.23	40.73		0	0	0	158.386	0	0	0	0	0	0
			Gulf of Aqaba		29.467	34.9297	A	2018-12-13	700	60	24.25	40.73		121.344	0	0	121.344	0	0	0	0	0	0
7 d			Gulf of Aqaba		29.467	34.9297	A	2018-12-13	700	100	24.25	40.73		124.284	0	0	497.136	0	0	0	0	0	0
			Gulf of Aqaba		29.467	34.9297	A	2018-12-13	700	140	24.26	40.73		0	0	0	224.577	0	0	0	0	0	0
9 insert, 12 a			Gulf of Aqaba		29.467	34.9297	A	2020-08-17	700	120	n/a	n/a
7 i			Gulf of Aqaba		29.467	34.9297	A	2021-12-16	700	2	n/a	n/a
