# Supplementary material for: Novel heterococcolithophores, holococcolithophores and life cycle combinations from the families Syracosphaeraceae and Papposphaeraceae and the genus &lt;i&gt;Florisphaera&lt;/i&gt;
Source: Copernicus journal article supplement (doi:10.5194/jm-40-75-2021), 2021-08-18
Supplement: Supplementary file 2 [file Suppl_TableS2_MeasurementsOphiaster.xlsx]

## Sheet: data
	BODY COCCOLITHS										OSTEOLITHS
		MACROSPINUS				FORMOSUS						MACROSPINUS			FORMOSUS
		X	Y	AREA			X	Y	AREA			X	Y		X	Y
	Ophiaster 1	1.208	0.693	2.62863		Ophiaster 1	1.5	1.029	4.84659		Ophiaster 1	2.803	1.36	Ophiaster 1	3.561	0.894
		1.285	0.845	3.40949			1.5	0.934	4.39914			2.821	1.657		3.241	1.094
		1.197	0.711	2.67235			1.457	0.988	4.52008			2.972	1.556		3.51	0.889
		1.118	0.618	2.1695		Ophiaster 2	1.33	0.871	3.63747			2.699	1.662	Ophiaster 2	3.212	0.914
		1.153	0.652	2.36051			1.451	0.905	4.12331			2.91	1.656		3.176	0.851
		1.17	0.755	2.77372			1.287	0.809	3.26931			2.704	1.574	Ophiaster 4	2.791	0.936
		1.445	0.762	3.45742			1.449	0.847	3.85373			2.967	1.663		3.043	1.015
		1.245	0.741	2.89679			1.382	1.004	4.35684			2.833	1.584		2.249	0.457
	Ophiaster 2	1.197	0.803	3.01814			1.348	0.945	3.99992			1.744	1.59		2.181	0.411
		1.153	0.704	2.54878			1.388	0.954	4.15784			2.896	1.7		2.617	0.5
		1.261	0.759	3.00529			1.371	0.857	3.68933		Ophiaster 2	3.05	1.481		3.726	0.75
	Ophiaster 3	1.205	0.828	3.1329			1.515	0.979	4.6572			3.122	1.358		3.078	0.872
		1.273	0.915	3.65746			1.35	0.923	3.9126			2.881	1.703		3.469	0.958
		1.176	0.788	2.9098		Ophiaster 3	1.584	1.029	5.118			2.699	1.685	Ophiaster 5	3.633	0.959
		1.33	0.885	3.69594			1.553	1.075	5.24215			3.312	1.556		3.521	0.812
	Ophiaster 4	1.142	0.747	2.67865			1.254	0.856	3.37055			3.012	1.689		3.262	0.745
		1.283	0.886	3.56936			1.455	1.003	4.58241			2.96	1.734		3.184	0.999
		1.201	0.85	3.20547			1.259	0.983	3.88605			2.872	1.685	Ophiaster 6	3.417	0.885
		1.112	0.744	2.59781			1.396	0.921	4.03715			3.049	1.753		3.264	0.895
	Ophiaster 5	1.097	0.768	2.64544			1.312	0.954	3.93017			2.912	1.738		3.185	1.01
		1.142	0.826	2.96194			1.226	0.906	3.48777		Ophiaster 3	2.98	1.605		2.978	1.029
		1.113	0.762	2.66305			1.541	1.098	5.31294			2.859	1.603		3.289	1.022
		1.149	0.855	3.08472			1.319	0.868	3.59496			2.863	1.66		3.259	0.974
		1.082	0.812	2.75875		Ophiaster 4	1.254	0.753	2.96498			2.747	1.754		3.382	0.948
		1.135	0.786	2.80123			1.117	0.725	2.54285			3.073	1.736	Ophiaster 7	3.124	1.089
		1.191	0.839	3.13764			1.178	0.762	2.81858		Ophiaster 4	2.706	1.742		3.466	1.059
		1.085	0.728	2.48022			1.253	0.827	3.25377		Ophiaster 5	2.826	1.699		3.197	1.003
		1.109	0.855	2.97733			1.262	0.89	3.52679			2.88	1.704		3.08018	0.675878
	Ophiaster 6	1.322	0.828	3.43709			1.249	0.855	3.35319			3.082	1.626		3.68687	0.806113
		1.249	0.776	3.04336			1.133	0.801	2.84965			2.963	1.755		3.70947	0.910947
		1.32	0.811	3.36143			1.398	0.915	4.01659			2.866	1.743		3.09352	0.702683
		1.313	0.846	3.48791			1.22	0.899	3.44389			3.113	1.561		2.06792	0.807568
		1.153	0.737	2.66825			1.076	0.724	2.44614			3.044	1.763		2.90098	0.865569
		1.223	0.718	2.75728		Ophiaster 4	1.103	0.777	2.69108			3.064	1.612		2.85116	0.738575
		1.294	0.738	2.99861		Ophiaster 5	1.283	0.903	3.63784			2.982	1.784		3.3285	0.806867
	Ophiaster 7	1.219	0.735	2.81333			1.296	0.88	3.58111			3.241	1.591		3.49432	0.868609
		1.112	0.877	3.0622			1.315	0.868	3.58406			3.031	1.683		3.01511	0.987418
		1.025	0.748	2.40744			1.241	0.831	3.23819			2.989	1.768		3.70434	0.853408
	Ophiaster 8	1.279	0.817	3.28112			1.336	0.791	3.31828			2.993	1.442	Ophiaster 8	3.25038	1.08688
		1.241	0.699	2.72382			1.223	0.845	3.24499			2.639	1.545		2.55689	0.881642
		1.04	0.704	2.29898		Ophiaster 6	1.364	0.887	3.79899		Ophiaster 6	3.004	1.535		3.25327	0.913176
		1.101	0.808	2.79337			1.372	0.805	3.468			2.947	1.54		3.2178	0.923162
		1.445	0.721	3.27139			1.513	0.829	3.93843			3.183	1.587		3.50791	0.996479
		1.221	0.801	3.07099			1.425	0.808	3.6154		Ophiaster 7	2.876	1.582		2.53219	0.677196
		1.094	0.639	2.19507			1.343	0.848	3.57603			3.211	1.527		2.23367	0.648026
	Ophiaster 9	1.188	0.765	2.85369			1.519	0.803	3.83004			2.874	1.393		2.52588	0.821464
		1.196	0.77	2.89169			1.347	0.939	3.97158			2.9	1.473		2.6649	0.804383
		1.205	0.787	2.97777			1.48353	0.948558	4.41867			2.995	1.533
		1.081	0.754	2.55933			1.53071	0.921933	4.4312			2.914	1.7
		1.235	0.799	3.09844			1.37846	0.780673	3.37902			2.784	1.619
		1.249	0.838	3.28652			1.44184	0.969409	4.38887			2.952	1.318
		1.242	0.843	3.2876			1.26292	0.687357	2.72576			3.198	1.492
		1.117	0.721	2.52882								2.897	1.574
		1.132	0.774	2.75117								2.976	1.626
		1.158	0.657	2.38893								2.702	1.59
												2.93	1.617
											Ophiaster 8	2.615	1.438
												3.037	1.652
												2.784	1.6
												2.898	1.719
												3.436	1.593
												3.343	1.44
												3.126	1.387
												3.136	1.419
											Ophiaster 9	2.669	1.453
												2.92	1.807
												2.728	1.686
												3.151	1.706
												2.834	1.647
												2.681	1.713
												2.762	1.728
												2.938	1.787
												3.251	1.396
												2.867	1.779
												2.898	1.728
												2.778	1.773
